# Supplementary material for: Effect of Different Edible Trichosanthes Germplasm on Its Seed Oil to Enhance Antioxidant and Anti-Aging Activity in Caenorhabditis elegans
Source: MDPI journal article supplement (doi:10.3390/foods13030503), 2024-02-05
Supplement: s1 [file s1]

Table S4. Effects of the seed oils from selected edible *Trichosanthes* germplasm on the body bending and pharyngeal pumping rates of *C. elegans* at different stages.

| Groups        | Adult age | Number of body bending in 30s | Number of pharyngeal pumping in 15s |
|---------------|-----------|-------------------------------|-------------------------------------|
| YNHH          | Day 3     | 18.87±0.63 <sup>A</sup>       | 59.73±0.76 <sup>A</sup>             |
| SDJN          |           | 18.47±0.34 <sup>A</sup>       | 55.43±0.21 <sup>B</sup>             |
| GXYL          |           | 18.18±0.09 <sup>AB</sup>      | 53.60±0.41 <sup>C</sup>             |
| Linseed oil   |           | 17.63±0.42 <sup>B</sup>       | 51.40±0.59 <sup>D</sup>             |
| SXHZ          |           | 17.53±0.21 <sup>B</sup>       | 49.50±0.08 <sup>E</sup>             |
| ZJQT          |           | 12.53±0.12 <sup>C</sup>       | 47.97±0.37 <sup>F</sup>             |
| Blank Control |           | 12.43±0.12 <sup>C</sup>       | 47.83±0.61 <sup>F</sup>             |
| YNHH          | Day 7     | 13.83±0.09 <sup>A</sup>       | 46.13±0.12 <sup>A</sup>             |
| SDJN          |           | 13.20±0.62 <sup>AB</sup>      | 45.07±0.12 <sup>B</sup>             |
| GXYL          |           | 12.43±0.34 <sup>BC</sup>      | 44.57±0.34 <sup>BC</sup>            |
| SXHZ          |           | 12.17±0.17 <sup>C</sup>       | 43.77±0.25 <sup>D</sup>             |
| Linseed oil   |           | 12.13±0.25 <sup>C</sup>       | 44.20±0.22 <sup>CD</sup>            |
| ZJQT          |           | 8.67±0.21 <sup>D</sup>        | 41.03±0.33 <sup>E</sup>             |
| Blank Control |           | 8.27±0.34 <sup>D</sup>        | 40.73±0.21 <sup>E</sup>             |

The data were analyzed by one way-ANOVA analysis and different uppercases indicated significant difference at level of 0.01 by Least-Significant Difference Test (LSD).

Red: *T. laceribractea* Hayata; Blue: *T. rosthornii* Harms; Green: *T. kirilowii* Maxim.
