# Supplementary material for: Effect of Different Edible Trichosanthes Germplasm on Its Seed Oil to Enhance Antioxidant and Anti-Aging Activity in Caenorhabditis elegans
Source: MDPI journal article supplement (doi:10.3390/foods13030503), 2024-02-05
Supplement: s1 [file s1]

Table S2. Effects of the seed oils from selected edible *Trichosanthes* germplasm on the longevity of *C. elegans*.

| Groups        | Mean lifespan (h)<br>(Mean $\pm$ SD) | Maximum lifespan (h)<br>(Mean $\pm$ SD) | Mean fold Change (%) |
|---------------|--------------------------------------|-----------------------------------------|----------------------|
| SDJN          | 22.17 $\pm$ 0.61 <sup>A</sup>        | 34.00 $\pm$ 0.00                        | 45.46                |
| YNHH          | 22.15 $\pm$ 0.65 <sup>A</sup>        | 34.00 $\pm$ 0.00                        | 45.31                |
| GXYL          | 20.80 $\pm$ 0.74 <sup>A</sup>        | 32.00 $\pm$ 0.00                        | 36.44                |
| SXHZ          | 18.98 $\pm$ 0.42 <sup>B</sup>        | 28.00 $\pm$ 0.00                        | 24.54                |
| Linseed oil   | 18.09 $\pm$ 0.72 <sup>B</sup>        | 26.00 $\pm$ 0.00                        | 18.65                |
| ZJQT          | 17.59 $\pm$ 0.40 <sup>B</sup>        | 24.00 $\pm$ 0.00                        | 15.40                |
| Blank Control | 15.24 $\pm$ 0.65 <sup>C</sup>        | 24.00 $\pm$ 0.00                        | /                    |

The data were analyzed by one way-ANOVA analysis and different uppercases indicated significant difference at level of 0.01 by Least-Significant Difference Test (LSD).

Red: *T. laceribractea* Hayata; Blue: *T. rosthornii* Harms; Green: *T. kirilowii* Maxim.
