# Supplementary material for: Effect of Different Edible Trichosanthes Germplasm on Its Seed Oil to Enhance Antioxidant and Anti-Aging Activity in Caenorhabditis elegans
Source: MDPI journal article supplement (doi:10.3390/foods13030503), 2024-02-05
Supplement: s1 [file s1]

Table S3. Effects of the seed oils from selected edible *Trichosanthes* germplasm on the lipofuscin accumulation of *C. elegans*.

| Groups           | Relative lipofuscin fluorescence | Change (%) |
|------------------|----------------------------------|------------|
| YNHH             | $0.30 \pm 0.02$ <sup>F</sup>     | - 70.35    |
| Positive control | $0.45 \pm 0.01$ <sup>E</sup>     | - 54.65    |
| SDJN             | $0.53 \pm 0.01$ <sup>D</sup>     | - 47.11    |
| GXYL             | $0.63 \pm 0.01$ <sup>C</sup>     | - 37.30    |
| ZJQT             | $0.75 \pm 0.00$ <sup>B</sup>     | - 25.31    |
| SXHZ             | $0.94 \pm 0.01$ <sup>A</sup>     | - 2.27     |
| Blank Control    | $1.00 \pm 0.00$ <sup>A</sup>     | /          |

The data were analyzed by one way-ANOVA analysis and different uppercases indicated significant difference at level of 0.01 by Least-Significant Difference Test (LSD).

Red: *T. laceribractea* Hayata; Blue: *T. rosthornii* Harms; Green: *T. kirilowii* Maxim.
