# Supplementary material for: Effect of Different Edible Trichosanthes Germplasm on Its Seed Oil to Enhance Antioxidant and Anti-Aging Activity in Caenorhabditis elegans
Source: MDPI journal article supplement (doi:10.3390/foods13030503), 2024-02-05
Supplement: s1 [file s1]

Table S1. Effects of the seed oils of from 18 edible *Trichosanthes* germplasm on oxidative stress tolerance in *C. elegans*

| Groups        | Mean lifespan (h)<br>(Mean $\pm$ SD) | Maximum lifespan (h)<br>(Mean $\pm$ SD) | Mean fold Change (%) |
|---------------|--------------------------------------|-----------------------------------------|----------------------|
| YNHH          | 22.18 $\pm$ 0.73 <sup>A</sup>        | 52.00 $\pm$ 0.00                        | 37.76                |
| HNXX          | 21.96 $\pm$ 0.22 <sup>AB</sup>       | 52.00 $\pm$ 0.00                        | 36.40                |
| HNZZ          | 21.68 $\pm$ 0.74 <sup>AB</sup>       | 52.00 $\pm$ 0.00                        | 34.66                |
| GXYL          | 21.59 $\pm$ 0.58 <sup>ABC</sup>      | 48.00 $\pm$ 0.00                        | 34.10                |
| JXJJ          | 21.55 $\pm$ 0.36 <sup>ABC</sup>      | 52.00 $\pm$ 0.00                        | 33.85                |
| AHAQ          | 21.47 $\pm$ 0.75 <sup>A-D</sup>      | 48.00 $\pm$ 0.00                        | 33.35                |
| JSXZ          | 21.20 $\pm$ 0.38 <sup>A-D</sup>      | 48.00 $\pm$ 0.00                        | 31.68                |
| Linseed oil   | 20.88 $\pm$ 0.33 <sup>B-E</sup>      | 49.33 $\pm$ 1.89                        | 29.69                |
| HNLY          | 20.87 $\pm$ 0.58 <sup>B-E</sup>      | 48.00 $\pm$ 0.00                        | 29.63                |
| SCNC          | 20.80 $\pm$ 0.10 <sup>B-E</sup>      | 48.00 $\pm$ 0.00                        | 29.19                |
| HBBD          | 20.42 $\pm$ 0.19 <sup>CDE</sup>      | 44.00 $\pm$ 0.00                        | 26.83                |
| SDJN          | 20.28 $\pm$ 0.26 <sup>DE</sup>       | 48.00 $\pm$ 0.00                        | 25.96                |
| ZJPH          | 19.83 $\pm$ 0.30 <sup>EF</sup>       | 44.00 $\pm$ 0.00                        | 23.17                |
| SXHZ          | 19.79 $\pm$ 0.37 <sup>FG</sup>       | 44.00 $\pm$ 0.00                        | 22.92                |
| GZGY          | 18.81 $\pm$ 0.18 <sup>FG</sup>       | 44.00 $\pm$ 0.00                        | 16.83                |
| HBSY          | 18.48 $\pm$ 0.32 <sup>G</sup>        | 40.00 $\pm$ 0.00                        | 14.78                |
| ZJCX          | 18.41 $\pm$ 0.78 <sup>G</sup>        | 40.00 $\pm$ 0.00                        | 14.35                |
| ZJQT          | 18.31 $\pm$ 0.38 <sup>G</sup>        | 40.00 $\pm$ 0.00                        | 13.73                |
| FJNP          | 18.09 $\pm$ 0.63 <sup>G</sup>        | 40.00 $\pm$ 0.00                        | 12.36                |
| Blank Control | 16.10 $\pm$ 0.41 <sup>H</sup>        | 36.00 $\pm$ 0.00                        | /                    |
| DMSO          | 15.94 $\pm$ 0.37 <sup>H</sup>        | 36.00 $\pm$ 0.00                        | -0.99                |

The data were analyzed by one way-ANOVA analysis and different uppercases indicated significant difference at level of 0.01 by Least-Significant Difference Test (LSD).

Red: *T. laceribractea* Hayata; Blue: *T. rosthornii* Harms; Green: *T. kirilowii* Maxim.
